# Supplementary material
Source: MDPI journal article supplement (https://www.mdpi.com/2073-4441/15/4/784)
Supplement: s1 [file s1]

Table S1: CFU/ml for the single taps #1-#12 for flushing Set-Up A, Incubation at 37°C.

| CFU/ml Flushing Set-Up A: Flushing once a day, Incubation at 37°C |            |            |            |            |            |            |
|-------------------------------------------------------------------|------------|------------|------------|------------|------------|------------|
| Tap /Date                                                         | 02.11.2020 | 16.11.2020 | 30.11.2020 | 10.02.2021 | 19.03.2021 | 21.04.2021 |
| #1                                                                | 30         | 200        | 210        | 52,5       | 20         | 20         |
| #2                                                                | 150        | 750        | 560        | 22,5       | 32,5       | 50         |
| #3                                                                | 40         | 140        | 280        | 115        | 17,5       | 5          |
| #4                                                                | 320        | 110        | 20         | 92,5       | 230        | 195        |
| #5                                                                | 220        | 120        | 70         | 18,5       | 25         | 45         |
| #6                                                                | 150        | 80         | 40         | 192,5      | 22,5       | 5          |
| #7                                                                | 30         | 110        | 50         | 52,5       | 30         | 30         |
| #8                                                                | 240        | 90         | 240        | 55         | 32,5       | 35         |
| #9                                                                | 120        | 30         | 80         | 32,5       | 2          | 15         |
| #10                                                               | 320        | 250        | 430        | 305        | 15         | 50         |
| #11                                                               | 630        | 880        | 540        | 600        | 115        | 395        |
| #12                                                               | 60         | 50         | 20         | 25         | 0          | 0          |

Table S2: CFU/ml for the single taps #1-#12 for flushing Set-Up A, Incubation at room temperature (RT).

| CFU/ml Flushing Set-Up A: Flushing once a day, Incubation at RT |            |            |            |            |
|-----------------------------------------------------------------|------------|------------|------------|------------|
| Tap /Date                                                       | 02.11.2020 | 16.11.2020 | 30.11.2020 | 21.04.2021 |
| #1                                                              | 50         | 130        | 130        | 10         |
| #2                                                              | 190        | 670        | 480        | 20         |
| #3                                                              | 80         | 180        | 250        | 15         |
| #4                                                              | 490        | 120        | 150        | 15         |
| #5                                                              | 500        | 80         | 80         | 150        |
| #6                                                              | 800        | 110        | 120        | 0          |
| #7                                                              | 80         | 100        | 60         | 45         |
| #8                                                              | 330        | 180        | 230        | 10         |
| #9                                                              | 120        | 50         | 160        | 10         |
| #10                                                             | 150        | 150        | 320        | 325        |
| #11                                                             | 400        | 730        | 740        | 365        |
| #12                                                             | 260        | 150        | 70         | 5          |

Table S3: CFU/ml for the single taps #1-#12 for flushing Set-Up B, Incubation at 37°C. For #10 the servo didn't work properly, so we couldn't use the data.

| CFU/ml Flushing Set-Up B: #1-#6: Flushing once a day, #7-#12: Flushing once a week, Incubation at 37°C |            |            |            |            |            |
|--------------------------------------------------------------------------------------------------------|------------|------------|------------|------------|------------|
|                                                                                                        | 23.06.2021 | 25.08.2021 | 13.10.2021 | 10.11.2021 | 08.12.2021 |
| #1                                                                                                     | 5          | 10         | 217,5      | 0          | 352,5      |
| #2                                                                                                     | 10         | 20         | 15         | 0          | 80         |
| #3                                                                                                     | 5          | 5          | 27,5       | 5          | 32,5       |
| #4                                                                                                     | 0          | 7,5        | 10         | 0          | 2,5        |
| #5                                                                                                     | 10         | 2,5        | 35         | 15         | 105        |
| #6                                                                                                     | 0          | 0          | 5          | 0          | 17,5       |
| #7                                                                                                     | 0          | 332,5      | 152,5      | 2795       | 125        |
| #8                                                                                                     | 100        | 90         | 62,5       | 162,5      | 52,5       |
| #9                                                                                                     | 105        | 22,5       | 42,5       | 265        | 337,5      |
| #10                                                                                                    | x          | x          | x          | x          | x          |
| #11                                                                                                    | 635        | 767,5      | 1015       | 2875       | 745        |
| #12                                                                                                    | 540        | 1167,5     | 797,5      | 352,5      | 1467,5     |

Tabelle S4: CFU/ml for the additional sampling points incubated at 37°C and room temperature (RT).

| additional sampling points | 37°C  |       |       | RT    |       |       |
|----------------------------|-------|-------|-------|-------|-------|-------|
|                            | Nr. 1 | Nr. 2 | Nr. 3 | Nr. 1 | Nr. 2 | Nr. 3 |
| CFU/ml                     |       |       |       |       |       |       |
| 02.11.2020                 | 0     | 10    | 0     | 0     | 20    | 10    |
| 16.11.2020                 | 0     | 0     | 0     | 0     | 10    | 0     |
| 30.11.2020                 | 0     | 10    | 0     | 0     | 0     | 0     |
| 10.02.2021                 | 0     | 2,5   | 0     | x     | x     | x     |
| 19.03.2021                 | 0     | 0     | 0     | x     | x     | x     |
| 21.04.2021                 | 0     | 0     | 0     | 0     | 5     | 0     |
| 23.06.2021                 | 0     | 0     | 0     | x     | x     | x     |
| 25.08.2021                 | 0     | 0     | 0     | 0     | 0     | 0     |
| 13.10.2021                 | 0     | 0     | 10    | x     | x     | x     |
| 10.11.2021                 | 0     | 0     | 0     | 0     | 0     | 0     |
| 08.12.2021                 | 0     | 0     | 0     | x     | x     | x     |
